# Supplementary material for: Calcium, Phosphate, and Vitamin D Status in Patients with Sarcoidosis—Associations with Disease Activity and Symptoms
Source: MDPI journal article supplement (doi:10.3390/jcm12144745), 2023-07-18
Supplement: s1 [file s1]

**Table S1.** Kits used for the measurement of the inflammatory parameters and vitamin D.

| Parameter                | Kit producent                                           |
|--------------------------|---------------------------------------------------------|
| ACE                      | Cloud Clone Corp. USA                                   |
| INF-gamma                | BioVendor Czech Republic                                |
| Neopterin                | IBL International GmBH                                  |
| 1,25(OH) <sub>2</sub> D3 | Immunodiagnostic System (IDS USA)                       |
| 25(OH)D3                 | Immunodiagnostic System (IDS USA)                       |
| sIL2-R                   | Diaclone SAS France                                     |
| hsCRP                    | biochemical analyzer Olympus AU 640e Beckman<br>Coulter |
